# Supplementary material for: Diabetes and Risk of Fracture-Related Hospitalization
Source: Oxford University Press journal article supplement (doi:10.2337/dc12-1168), 2012-12-18
Supplement: dc121168supplementarydata.pdf [file dc121168supplementarydata.pdf]

## SUPPLEMENTARY DATA

Model was adjusted for age, sex and race/study center, body mass index, sports-activity tertile, alcohol consumption, cigarette smoking, and medication use.

Torso (shoulder, hip, ribs, spine) fractures were defined as an ICD-9 discharge code of 805-811. Upper limb (arm, wrist, hand) fractures were defined as an ICD-9 discharge code of 812-817. Lower limb (leg, ankle, foot) fractures were defined as an ICD-9 discharge code of 820-826. Vertebral fractures were defined as an ICD-9 discharge code of 805-806. Hip fractures were defined as an ICD-9 discharge code of 808. Skull/face fractures were defined as an ICD-9 discharge code of 800-804.

**Supplementary Table 1.** Adjusted Hazard Ratios for Incident Fracture Hospitalization Subtypes by Diabetes Status Among Study Participants from Baseline (Visit 1: 1987-1989) to January 1, 2009.

|                    | No Diabetes<br>(n=13,340) | Undiagnosed<br>Diabetes (n=605) | Diagnosed Diabetes<br>(n=1,195) |
|--------------------|---------------------------|---------------------------------|---------------------------------|
| Torso (n=306)      | 1.00 (Reference)          | 1.29 (0.73, 2.27)               | 1.16 (0.71, 1.87)               |
| Upper Limb (n=180) | 1.00 (Reference)          | 0.18 (0.03, 1.33)               | 2.16 (1.31, 3.57)               |
| Lower Limb (n=542) | 1.00 (Reference)          | 1.24 (0.80, 1.92)               | 2.22 (1.69, 2.91)               |
| Vertebral (n=104)  | 1.00 (Reference)          | 0.84 (0.26, 2.69)               | 2.03 (1.05, 3.89)               |
| Hip (n=50)         | 1.00 (Reference)          | 2.99 (1.24, 7.21)               | 1.76 (0.68, 4.60)               |
| Skull/Face         | 1.00 (Reference)          | 1.52 (0.46, 4.98)               | 2.60 (1.17, 5.76)               |
